# Supplementary material for: Vapor-assisted crystallization of in situ glycine-modified UiO-66 with enhanced CO2 adsorption
Source: Royal Society of Chemistry journal article supplement (doi:10.1039/d1nj05284e), 2021-12-22
Supplement: d1nj05284e1.pdf [file d1nj05284e1.pdf]

## Supplementary Information

### Vapor-assisted crystallization of *in situ* glycine-modified UiO-66 with enhanced CO<sub>2</sub> adsorption

Yugo Fujimoto,<sup>[a]</sup> Yasuhiro Shu,<sup>[a]</sup> Yurika Taniguchi,<sup>[a]</sup> Koji Miyake,<sup>[a]\*</sup> Yoshiaki Uchida,<sup>[a]</sup> Shunsuke Tanaka<sup>[b]</sup> and Norikazu Nishiyama<sup>[a]</sup>

a) Division of Chemical Engineering, Graduate School of Engineering Science, Osaka University, 1-3 Machikaneyama, Toyonaka, Osaka 560-8531, Japan.

b) Department of Chemical, Energy and Environmental Engineering, Faculty of Environmental and Urban Engineering, Kansai University, 3-3-35 Yamate-cho, Suita-shi, Osaka, 564-8680, Japan.

E-mail: [kojimiya@cheng.es.osaka-u.ac.jp](mailto:kojimiya@cheng.es.osaka-u.ac.jp)

1. XRD patterns of prepared UiO-66 compared to simulated UiO-66

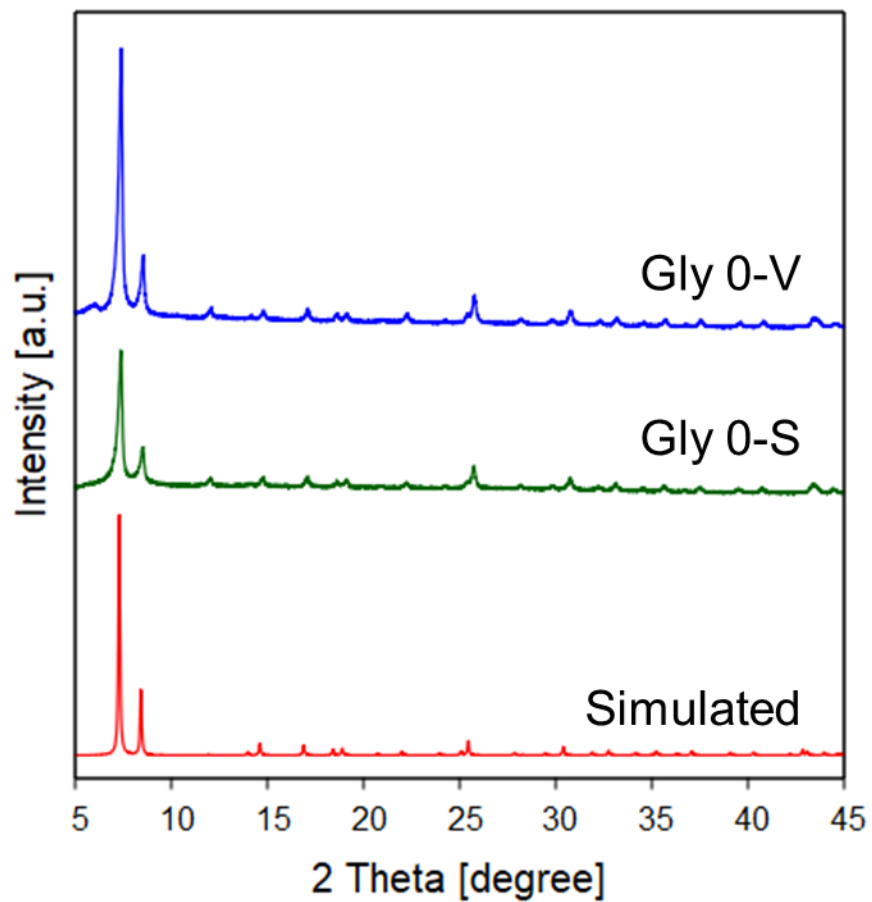

Fig. S1 XRD patterns of Gly 0-V, Gly 0-S and simulated UiO-66.

2. Effect of acid sources

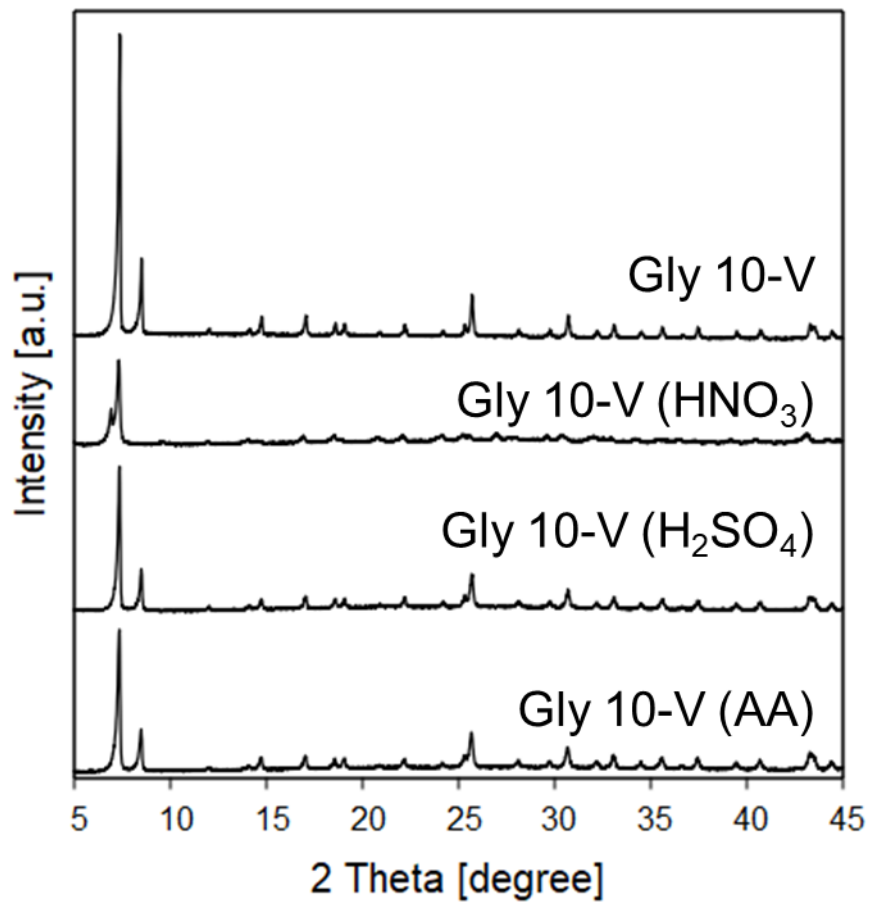

Fig. S2 XRD patterns of Gly 10-V and Gly 10-V (other type of acid).

### 3. TEM images

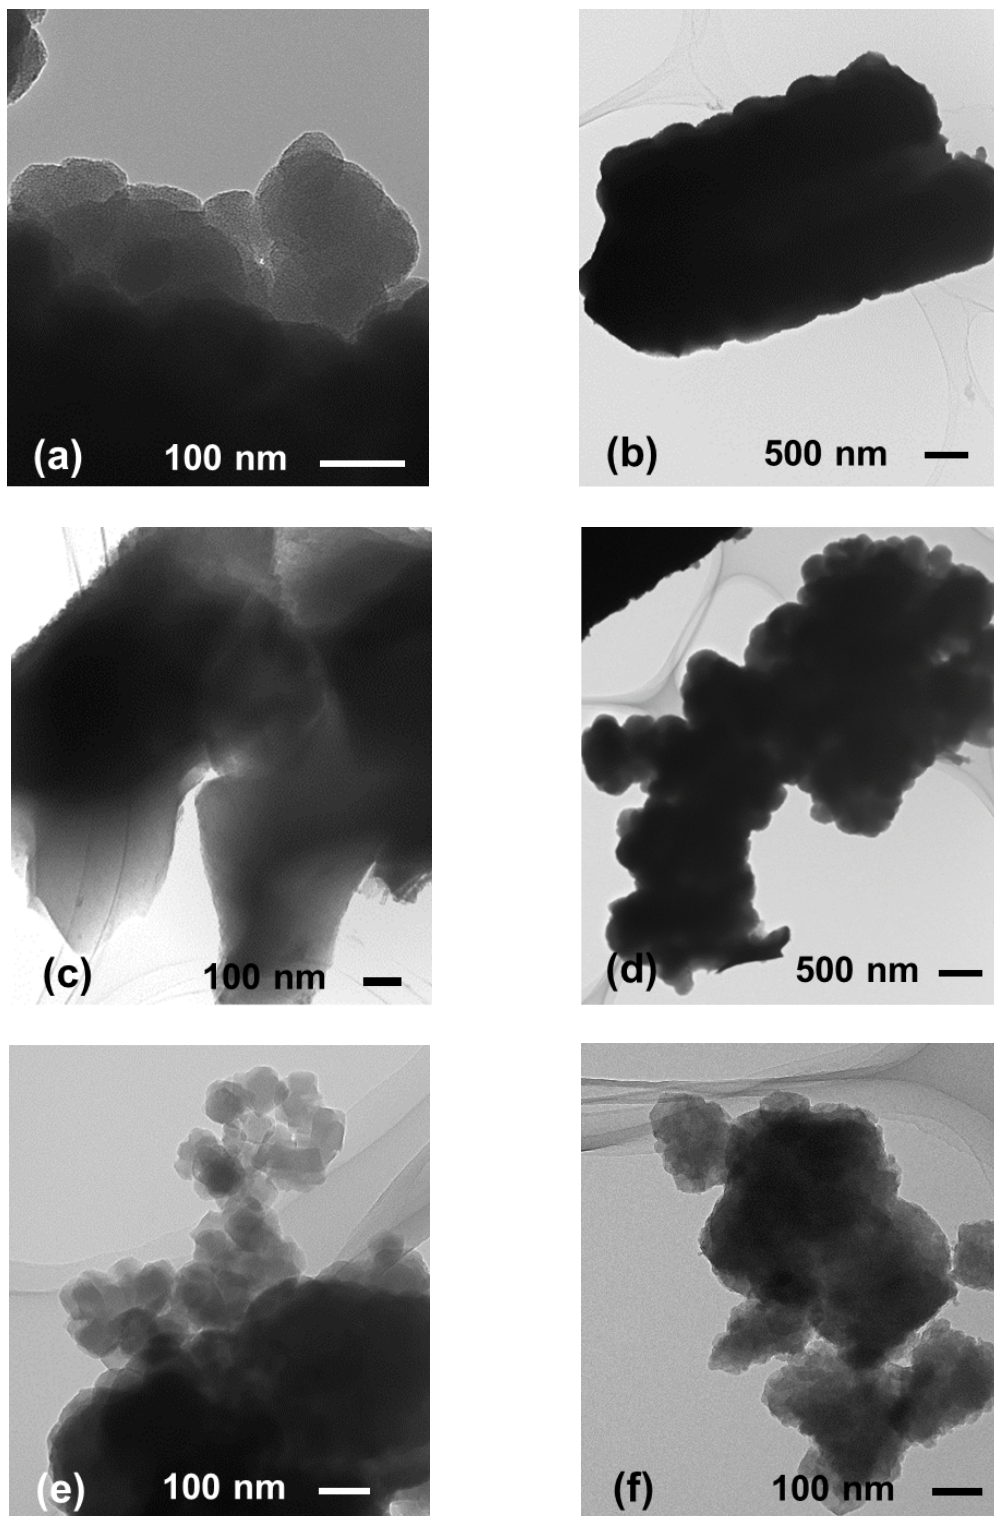

Fig. S3 TEM images of Gly 0-V (a), Gly 5-V (b), Gly 10-V (c), Gly 20-V (d), Gly 0-S (e) and Gly 10-S (f).

4. Textual property corresponding to Fig. 2 (a)

Table S1 Textual properties of Gly 0-V, Gly 10-V, Gly 0-S and Gly 10-S determined by the N<sub>2</sub> adsorption analysis.

| Sample   | $S_{BET}$ [m <sup>2</sup> /g] | $V_{total}$ [cm <sup>3</sup> /g] | $V_{micro}$ [cm <sup>3</sup> /g] |
|----------|-------------------------------|----------------------------------|----------------------------------|
| Gly 0-V  | 1006.9                        | 0.56                             | 0.39                             |
| Gly 10-V | 1065.7                        | 0.64                             | 0.40                             |
| Gly 0-S  | 495.2                         | 0.40                             | 0.19                             |
| Gly 10-S | 483.3                         | 0.27                             | 0.18                             |
